# Supplementary material
Source: publisher figshare collection journal article supplement (https://acs.figshare.com/ndownloader/files/5176525)
Supplement: Supplementary file 1 [file 5176525]

## SUPPORTING INFORMATION:

All DFT optimizations were performed 6-31G(d,p)/B3LYP level of theory until the largest component of the gradient was less than 0.0005 Hartree/Bohr. For the isolated planar DT-TTF molecule all atoms were initially placed in the x-y plane to assist obtaining the planar minimum during optimization. For all other isolated molecules no constraints were applied. For the embedded calculations molecules surrounding the central molecules were fixed at their crystallographic positions to represent the steric constraint of the full crystal packing, whilst the embedded molecule was allowed to relax with no symmetry constraints. The embedding molecules are fixed in the positions and geometries of the nearest neighboring molecules from the available X-ray crystal data with electronic properties of the environment i.e. polarization and charge transfer (delocalization) both fully incorporated. The molecules are fixed at the respective crystal positions in order to represent, as accurately as possible, the actual local embedding environment of the real crystal. If this constraint was not applied and the embedding environment allowed to fully relax, then the molecules would adopt the minimum energy configuration of a small cluster of molecules (e.g. molecules could freely reorientate and distort without the constraining effect of the long range crystal packing) which is very unlikely to accurately mirror the crystalline local environment we are trying to model. The method we use has the additional advantage that the effect of local intermolecular interactions on the reorganization energy of a single molecule can be discerned, rather than the reorganization energy of a sub-region of a crystal, thus enabling us to compare our embedded results with our single molecule calculations. Differences in bond lengths for isolated and embedded molecules when charged and neutral are reported below. The total charges per molecule quoted in table 1 in the text are estimated by summing over all Mulliken partitioned atomic charges within the embedded charged molecule. In order to check that the observed significant structural changes in the embedded charged DT-TTF molecule (with respect to the isolated +1-charged isolated DT-TTF molecule) are not caused by an effective improvement in the representation of the electronic environment of the embedded molecule due to basis set superposition effects, the isolated +1-charged DT-TTF molecule was also optimized at the 6-311++G(2d,2p)/B3LYP level resulting in maximal differences of only 0.003 Å with respect to the isolated 6-31G(d,p)/B3LYP calculation.

The electronic coupling between adjacent DT-TTF molecules in the crystal was estimated by the method described in reference 6 i.e. Two AM1-optimized DT-TTF molecules (in the planar conformation) were placed at the respective crystal positions as neighbours in a near cofacial stack along the conducting c-direction. The splitting of the HOMO levels due to this configuration were then calculated using the INDO/S Hamiltonian. Half of the calculated splitting gives an estimate of the transfer integral. For DT-TTF we found this value to be 34 meV. For pentacene the transfer integral has previously been calculated using this methodology in ref 5b giving values ranging from 47-80 meV depending on the direction taken through the crystal.

Pentacene:

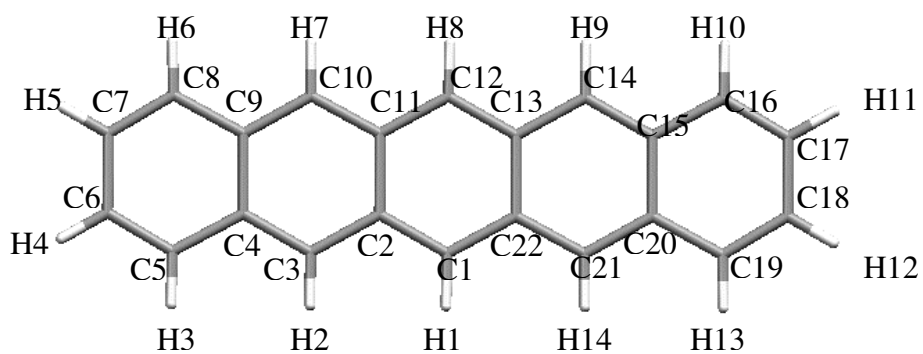

| Bond    | $\Delta$ Length<br>neutral / Å | $\Delta$ Length<br>charged / Å |
|---------|--------------------------------|--------------------------------|
| C1-C2   | -0.002                         | 0.000                          |
| C2-C3   | 0.000                          | -0.007                         |
| C3-C4   | -0.003                         | 0.007                          |
| C4-C5   | 0.002                          | -0.008                         |
| C5-C6   | -0.001                         | 0.006                          |
| C6-C7   | 0.003                          | -0.006                         |
| C7-C8   | -0.001                         | 0.006                          |
| C8-C9   | 0.000                          | -0.009                         |
| C9-C10  | -0.002                         | 0.007                          |
| C10-C11 | -0.001                         | -0.006                         |
| C11-C12 | -0.002                         | -0.001                         |
| C12-C13 | -0.002                         | -0.002                         |
| C13-C14 | -0.001                         | -0.007                         |
| C14-C15 | -0.002                         | 0.007                          |
| C15-C16 | 0.001                          | -0.009                         |
| C16-C17 | -0.001                         | 0.006                          |
| C17-C18 | 0.003                          | -0.006                         |
| C18-C19 | -0.001                         | 0.006                          |
| C19-C20 | 0.000                          | -0.008                         |
| C20-C21 | -0.002                         | 0.007                          |
| C21-C22 | -0.002                         | -0.007                         |
| C22-C1  | -0.002                         | 0.001                          |
| C6-C7   | 0.003                          | -0.006                         |
| C4-C9   | 0.002                          | -0.002                         |
| C2-C11  | 0.001                          | 0.000                          |
| C13-C22 | 0.001                          | -0.001                         |
| C15-C20 | 0.002                          | -0.003                         |
| C17-C18 | 0.003                          | -0.006                         |
| C1-H1   | 0.002                          | 0.001                          |
| C3-H2   | 0.002                          | 0.001                          |
| C5-H3   | 0.003                          | 0.003                          |
| C6-H4   | -0.001                         | -0.002                         |
| C7-H5   | -0.002                         | -0.002                         |
| C8-H6   | 0.003                          | 0.002                          |
| C10-H7  | 0.002                          | 0.001                          |
| C12-H8  | 0.002                          | 0.002                          |
| C14-H9  | 0.002                          | 0.002                          |
| C16-H10 | 0.004                          | 0.004                          |
| C17-H11 | -0.001                         | 0.00                           |
| C18-H12 | 0.000                          | -0.002                         |
| C19-H13 | 0.004                          | 0.002                          |
| C21-H14 | 0.002                          | 0.001                          |

DT-TTF:

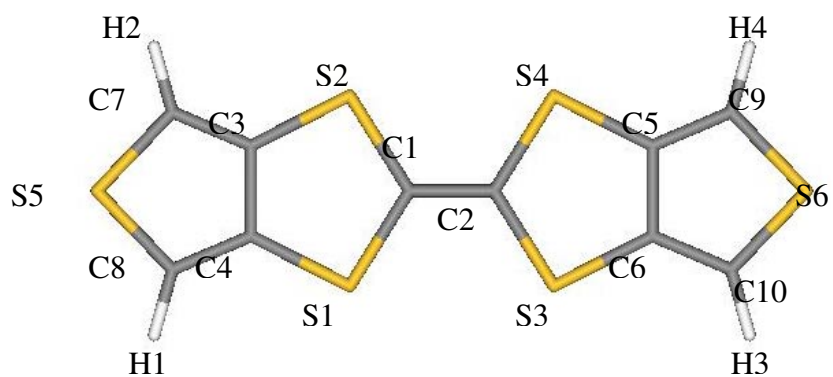

| Bond   | $\Delta$ Length<br>neutral / Å | $\Delta$ Length<br>charged / Å |
|--------|--------------------------------|--------------------------------|
| C1-C2  | 0.000                          | 0.039                          |
| C1-S1  | 0.003                          | -0.027                         |
| C1-S2  | 0.004                          | -0.028                         |
| C2-S3  | 0.003                          | -0.027                         |
| C2-S4  | 0.003                          | -0.028                         |
| S1-C4  | 0.002                          | -0.006                         |
| S2-C3  | 0.002                          | -0.006                         |
| S3-C6  | 0.002                          | -0.007                         |
| S4-C5  | 0.002                          | -0.006                         |
| C3-C4  | -0.001                         | 0.001                          |
| C5-C6  | -0.002                         | 0.001                          |
| C3-C7  | 0.000                          | 0.003                          |
| C4-C8  | -0.001                         | 0.003                          |
| C5-C9  | 0.000                          | 0.003                          |
| C6-C10 | 0.000                          | 0.002                          |
| C7-S5  | -0.001                         | -0.008                         |
| C8-S5  | -0.001                         | -0.007                         |
| C9-S6  | -0.001                         | -0.007                         |
| C10-S6 | 0.000                          | -0.007                         |
| C7-H2  | 0.000                          | 0.002                          |
| C8-H1  | 0.000                          | 0.001                          |
| C9-H4  | 0.000                          | 0.000                          |
| C10-H3 | 0.000                          | 0.002                          |
| S3-C6  | 0.000                          | 0.039                          |
